# The Residents' JOURNAL

## The American Journal of Psychiatry Residents' Journal

August 2015

Volume 10

Issue 8

### Inside

- 2 **Biological Psychiatry**  
Adarsh S. Reddy, M.D., Ph.D.
- 3 **Traumatic Brain Injury and Juvenile Criminal Behavior**  
Matthew E. Hirschtritt, M.D., M.P.H.
- 6 **Neurobiology of Consciousness: Relevance and Application in Psychiatry**  
Gopalkumar Rakesh, M.D.
- 10 **White Matter Dysfunction Central to Neurodevelopment of Schizophrenia: A Review of Emerging Literature**  
Amy E. Curtis, M.D.
- 13 **A Brief Introduction to Resting State Functional Connectivity**  
Alecia Vogel-Hammen, M.D., Ph.D.
- 16 **Optogenetic Applications in Psychiatric Research**  
Julio M. Bernardi, M.D.
- 19 **Brain on Fire: My Month of Madness**  
Reviewed by Janet Charoensook, M.D.
- 20 **Residents' Resources**

### IN THIS ISSUE

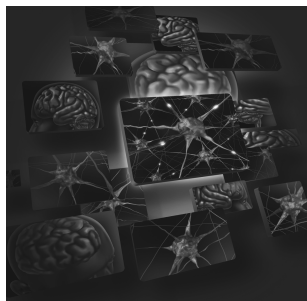

This issue of the *Residents' Journal* focuses on the topic of **Biological Psychiatry**. In an editorial, Adarsh S. Reddy, M.D., Ph.D., discusses the importance of understanding the biological underpinnings of psychiatric illnesses. Matthew E. Hirschtritt, M.D., M.P.H., examines evidence for and against a causal mechanism linking traumatic brain injury (TBI) and criminality in youths, with discussion on the neurobiology of TBI. Gopalkumar Rakesh, M.D., investigates the neurobiology of consciousness and its relevance and application in psychiatry. Amy E. Curtis, M.D., presents a review of white matter dysfunction central to the neurodevelopment of schizophrenia. Alecia Vogel-Hammen, M.D., Ph.D., provides important information on resting state functional connectivity. Julio M. Bernardi, M.D., examines optogenetic applications in psychiatric research. Lastly, Janet Charoensook, M.D., presents a review of the book *Brain on Fire: Month of Madness*, about a rare neuro-immunological illness that manifested with prominent psychosis.

**Editor-in-Chief**  
Rajiv Radhakrishnan, M.B.B.S., M.D.

**Senior Deputy Editor**  
Katherine Pier, M.D.

**Deputy Editor**  
Hun Millard, M.D., M.A.

**Guest Section Editor**  
Adarsh S. Reddy, M.D., Ph.D.

**Associate Editors**  
Rafik Sidaros, M.B.B.Ch.  
Janet Charoensook, M.D.

**Staff Editor**  
Angela Moore

**Editors Emeriti**  
Sarah B. Johnson, M.D.  
Molly McVoy, M.D.  
Joseph M. Cerimele, M.D.  
Sarah M. Fayad, M.D.  
Monifa Seawell, M.D.  
Misty Richards, M.D., M.S.

### Editor-in-Chief

Rajiv Radhakrishnan, M.B.B.S., M.D.

### Senior Deputy Editor

Katherine Pier, M.D.

### Deputy Editor

Hun Millard, M.D., M.A.

### Associate Editors

Rafik Sidaros, M.B.B.Ch.

Janet Charoensook, M.D.

*The Residents' Journal* accepts manuscripts authored by medical students, resident physicians, and fellows. To submit your paper, please visit the manuscript submission site at [mc.manuscriptcentral.com/appi-ajp](http://mc.manuscriptcentral.com/appi-ajp) and either create an account or use your existing account. For manuscript type, select "Residents." Then follow the instructions to upload your manuscript. Residents who are interested in participating as Guest Section Editors should e-mail *The Residents' Journal* Editor-in-Chief Rajiv Radhakrishnan at [rajiv.radhakrishnan@yale.edu](mailto:rajiv.radhakrishnan@yale.edu).

*The Residents' Journal* is sent free-of-charge to all psychiatry residents. Anyone interested in being included on the distribution list should contact Angela Moore, *The Residents' Journal* staff editor at [ajp@psych.org](mailto:ajp@psych.org) with "Subscribe to Residents' Journal" in the subject line.

To access the complete Residents' Journal archives, visit [ajp.psychiatryonline.org/residents\\_journal](http://ajp.psychiatryonline.org/residents_journal)

# Leading the way

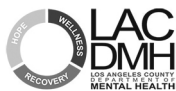

"I was attracted by the opportunity to do Telepsychiatry with DMH; it's the first time it's ever been done in an urban setting."

*Amber Kondor, MD  
General Psychiatrist*

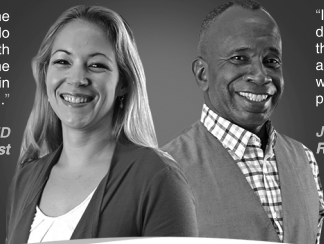

"It's a large, dynamic department, just like the city...it affords me an opportunity to work with a lot of different people."

*James R. Jones, MD  
Regional Medical*

Join the largest, most dynamic mental health department in the nation. We are creating the future of mental health services, and we are seeking physicians who are ready to join our team and push the boundaries of traditional community practice.

To learn more about employment as a psychiatrist with the Los Angeles County Department of Mental Health, including salary and benefits, please visit:

[www.psychiatristjobs.la](http://www.psychiatristjobs.la)

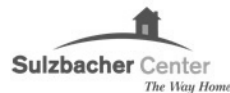

The Sulzbacher Center, Northeast Florida's largest provider of comprehensive services for the homeless and those living below the poverty level, is seeking a Psychiatrist who is looking to share his/her skills with this very special patient population. The position is located in sunny Jacksonville Florida, and offers a flexible schedule with competitive benefits and no on-call, evenings or weekends. The Sulzbacher Clinic is a Federally Qualified Health Center and a HRSA-certified Medical Home.

**Qualifications:** Must be Board Eligible/Board Certified and licensed to practice in Florida. A minim of 5 years in a clinical setting, including previous supervisory experience is preferred. Ability to lead a dynamic team is crucial, along with excellent interpersonal and time management skills.

**About Jacksonville:** Jacksonville's convenient location, mild climate, reasonable cost of living and high quality of life have made it a popular choice for corporate expansion, relocation and retirement. Downtown Jacksonville offers quaint riverfront streets lined with boutiques, live music venues and sidewalk cafes. A few miles away there are white sandy beaches to explore – a true paradise for hiking, camping and water sports.

The Sulzbacher Clinics are eligible for the National Health Service Corps Loan Repayment Program.

To apply, contact Kara Russell at [kararussell@tscjax.org](mailto:kararussell@tscjax.org)

## CHILD and CHIEF PSYCHIATRIST

Contractor: Seeking psychiatrist to provide services at **LA Child Guidance Clinic**. Work in a large children's mental health clinic affiliated with **County + USC Medical Center's School of Child and Adolescent Psychiatry**.

Psychiatrists must possess and provide updated documentation of current, valid licenses or certificates.

Send current vitae and cover letter to:

[hr@lacgc.org](mailto:hr@lacgc.org)

**Human Resources Dep., or contact**

**Jackie Garcia for further information**

**3031 S. Vermont Avenue**

**Los Angeles, CA 90007**

**FAX: 323-373-1946 | TEL: 323-373-2400**

**EOE/ADA**

**Psychiatric Services** (ISSN |1075-2730; online version, 1557-9700) is published monthly by the American Psychiatric Association, editorial and executive office, 1000 Wilson Blvd., Suite 1825, Arlington, VA 22209-3901. Copyright © 2015 by the American Psychiatric Association. Printed in U.S.A. Periodicals postage paid at Arlington, VA, and at additional mailing offices. POSTMASTER: Send address changes to **Psychiatric Services, 1000 Wilson Blvd., Suite 1825, Arlington, VA 22209-3901.**

Exceptional Careers with  
**THE SALARY  
YOU  
DESERVE**

**Staff Psychiatrist**  
**\$237,864 - \$293,340** annual salary  
**\$10,000 Retention Bonus**  
**J-1 Waiver & H-1B Visa Sponsorship**

**Leadership & Management positions also available!**

To learn more, please contact  
**Dr. John Lindgren** at **209.351.7225** or  
**Psychiatry.Jobs@cdcr.ca.gov.**  
For additional information, you may also visit  
**www.ChangingPrisonHealthCare.org**

We offer a 40-hour work week, highly competitive salary, a retirement plan that vests in only five years, and all of the security and benefits that come with State employment. **California State Prison, Sacramento** is located near family-friendly Folsom, a city that offers excellent schools and many activities including expansive bike trails, boating on Folsom Lake, and shopping at upscale boutiques.

Generous benefits include:

- Medical (several choices)
- Dental
- Vision
- Sick Leave (12 days/year)
- Vacation (10 days/year)
- Holidays (additional 12 days/year)
- CME Leave (56 hours/year)
- CME Stipend
- Retirement Stipend (vests in 5 years)
- 4-day work week

California Department of Corrections & Rehabilitation

Ad#S9-SAC EOE

## APA Seeks Editor-in-Chief, Books

The American Psychiatric Association (APA) is seeking applicants for the position of Editor-in-Chief, Books. The Editor-in-Chief works with the APA's Publisher, Associate Publisher, Editorial Board, and other APA administration members in the editorial development of print books and electronic products, implementing book program strategy, guiding content direction, soliciting and reviewing book proposals and manuscripts, reviewing backlist publications, and positing new frontlist titles. The current Editor-in-Chief concludes his final term on June 1, 2016.

Applicants must be APA members with knowledge of and experience in book publishing (digital and print), mental health research, and clinical care for people with mental illness. Applications are due by October 30, 2015. Candidates should submit their curriculum vitae and a cover letter outlining their qualifications by e-mail to [EditorBooksSearch@psych.org](mailto:EditorBooksSearch@psych.org). For further information, please contact Rebecca Rinehart, Publisher: [rrinehart@psych.org](mailto:rrinehart@psych.org), 703-907-7876.

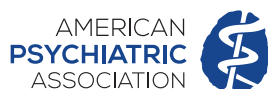

AH1536J

## APA Seeks Editor for *Psychiatric Services*

The American Psychiatric Association (APA) is seeking applicants for the position of Editor of *Psychiatric Services*, APA's monthly mental health services research and policy journal. The current Editor concludes his final term on December 31, 2016.

Applicants must be APA members who have knowledge of and experience in the field of mental health services research and in established and emerging evidence-based practices for people with serious mental illness.

Applications are due by September 30, 2015. Candidates should submit their curriculum vitae and a cover letter outlining their qualifications by e-mail to **[PSEditorSearch@psych.org](mailto:PSEditorSearch@psych.org)**. For further information, please contact Rebecca Rinehart, Publisher: [rrinehart@psych.org](mailto:rrinehart@psych.org), 703-907-7876.

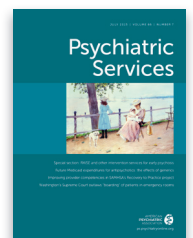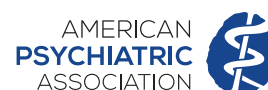

AH1535A

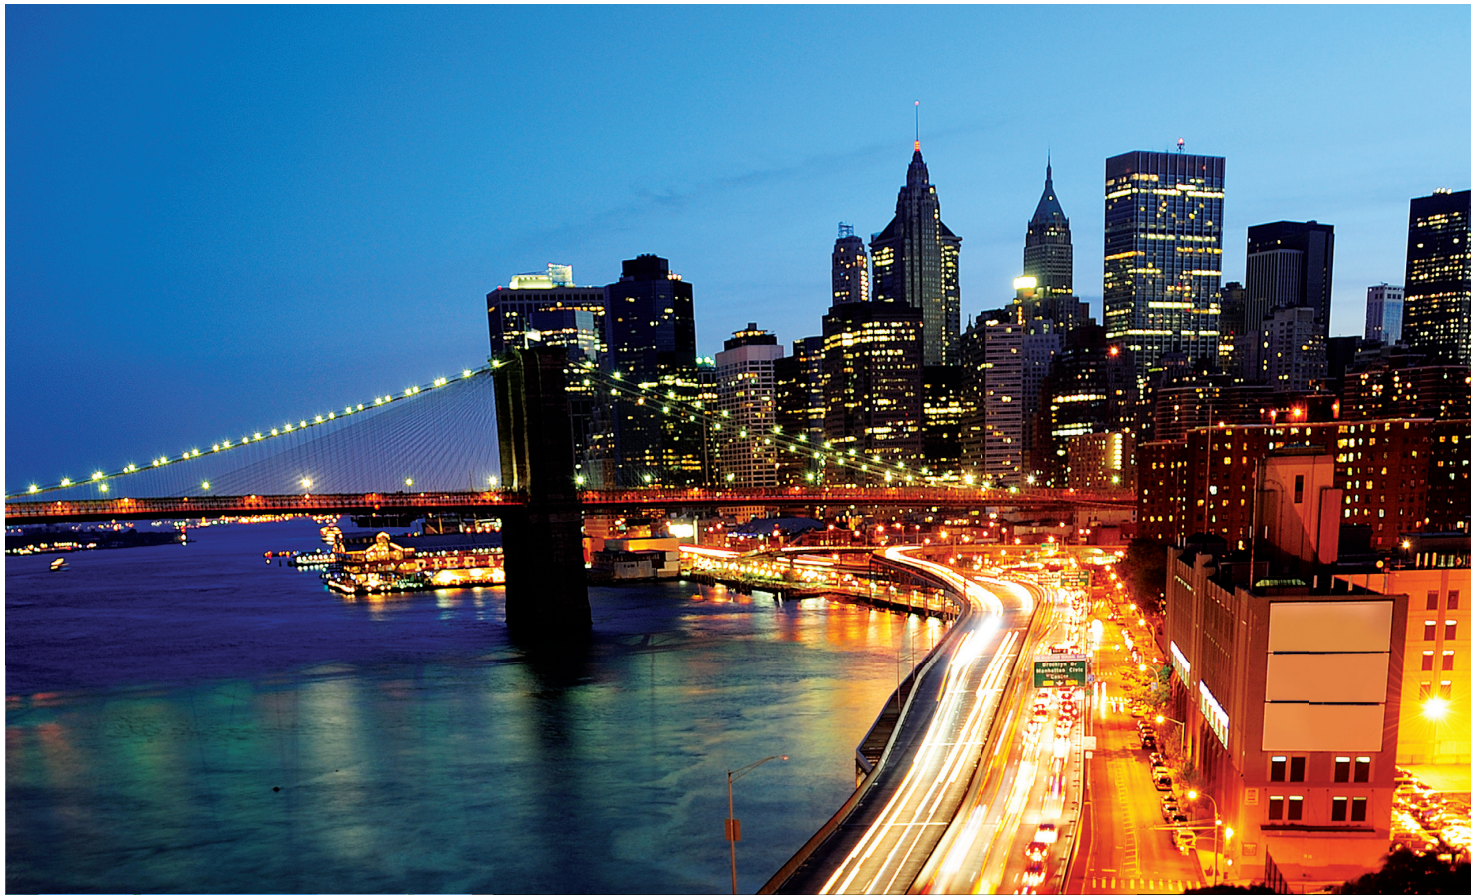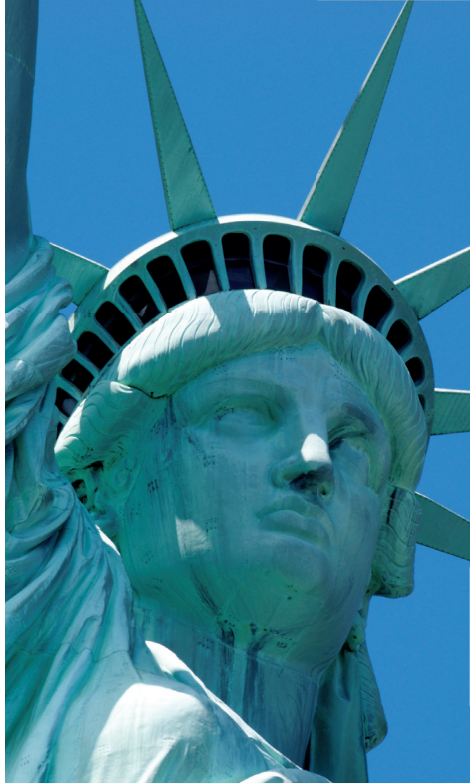

AMERICAN  
PSYCHIATRIC  
ASSOCIATION

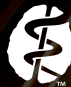

## IPS: THE MENTAL HEALTH SERVICES CONFERENCE

Oct. 8-11, 2015 • New York City

When Good Care

# Confronts Red Tape:

Navigating the System for Our Patients and Our Practice

Sheraton New York Hotel & Towers

APA's Leading Educational Conference on Public, Community and Clinical Psychiatry

For more info, visit [psychiatry.org/ips](http://psychiatry.org/ips)

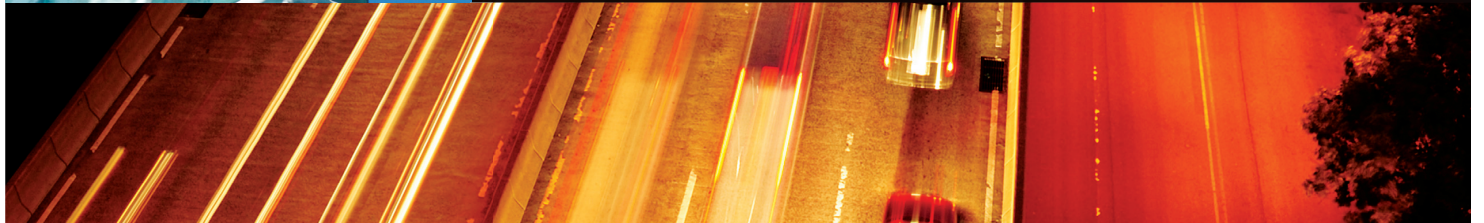

Source: https://psychiatryonline.org/doi/suppl/10.1176/ps.2015.66.issue-9/suppl_file/back.pdf
