# There's So Much More to PSYCHIATRIC SERVICES Than Meets the Page!

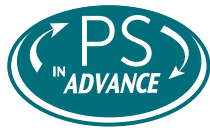

## Psychiatric Services in Advance

Latest research reports!

### Medicaid Coverage Critical for by Children With Autism

A study of services used by more than 24,000 Medicaid-enrolled children with psychiatric disorders in Philadelphia highlights the importance of Medicaid coverage for children with autism spectrum disorder, who accounted for the highest per-child expenditures.

### Reoffending Among Inmates Who Received Prison Services

Roughly 46% of state prison inmates who received mental health services before their release were reincarcerated within 24 months. For reasons that are unclear, inmates with the most serious offenses and longest sentences were least likely to be rearrested.

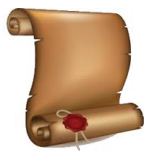

Revisit the field's rich history!

### 50 Years Ago in *Psychiatric Services*

- Early Experiences With a Mixed-Sex Ward
- Resocializing Patients in a Neighborhood Center
- Techniques for Treatment Team Meetings

AMERICAN  
PSYCHIATRIC  
ASSOCIATION  
PUBLISHING

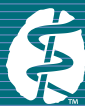

[ps.psychiatryonline.org](http://ps.psychiatryonline.org)

[www.appi.org](http://www.appi.org) • 1-800-368-5777 • Fax: 703-907-1091 • Email: [appi@psych.org](mailto:appi@psych.org)

Priority Code AH1520

## FREE Online Subscription to *Psychiatric Services* for APA Resident-Fellow Members (RFMs)!

American Psychiatric Association Resident-Fellow Members (RFMs) can receive a free online subscription to *Psychiatric Services*.

Simply visit [ps.psychiatryonline.org](http://ps.psychiatryonline.org) for full-text access to all of the content of APA's highly ranked, peer-reviewed monthly journal. *Psychiatric Services* focuses on service delivery in organized systems of care, evolving best practices, and federal and state policies that affect the care of people with mental illnesses.

Please visit [ps.psychiatryonline.org](http://ps.psychiatryonline.org) and log in with your American Psychiatric Association username and password.

Psychiatry residents who are not currently APA Resident-Fellow Members should consider membership in the American Psychiatric Association. The benefits provided to residents are an example of how the APA serves the needs of its members throughout their careers. The low introductory dues APA extends to RFMs are even waived for the first year. Please visit [www.psychiatry.org/joinapa](http://www.psychiatry.org/joinapa) for more information.

[ps.psychiatryonline.org](http://ps.psychiatryonline.org)

AMERICAN  
PSYCHIATRIC  
ASSOCIATION  
PUBLISHING

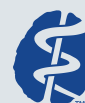

[www.appi.org](http://www.appi.org)  
Email: [appi@psych.org](mailto:appi@psych.org)  
Toll-Free: 1-800-368-5777

AH1507A

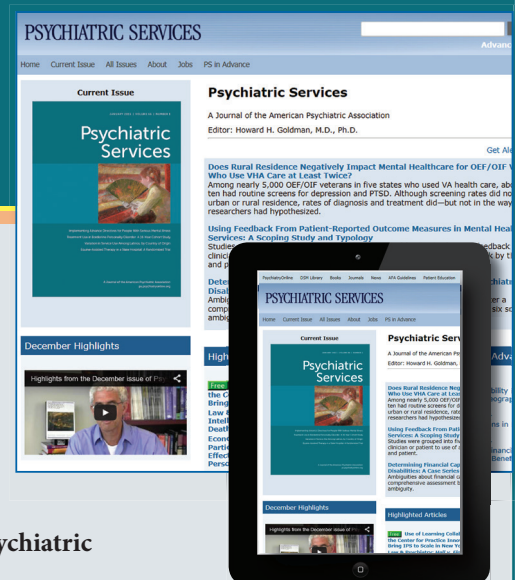

Source: https://psychiatryonline.org/doi/suppl/10.1176/ps.2015.66.issue-9/suppl_file/front.pdf
